# Supplementary material for: Quantifying and comparing radiation damage in the Protein Data Bank
Source: PubMed Central journal article supplement (PMC8921271; doi:10.1038/s41467-022-28934-0), 2022-03-14
Supplement: 41467_2022_28934_MOESM1_ESM.pdf [file 41467_2022_28934_MOESM1_ESM.pdf]

## Supplementary Information

### Quantifying and comparing radiation damage in the Protein Data Bank

Kathryn L. Shelley<sup>1,2\*</sup> and Elspeth F. Garman<sup>1\*</sup>

<sup>1</sup>Department of Biochemistry, University of Oxford, South Parks Road, Oxford, OX1 3QU, United Kingdom

<sup>2</sup>School of Chemistry, University of Bristol, Cantock's Close, Bristol, BS8 1TS, United Kingdom

[kathryn.l.shelley@gmail.com](mailto:kathryn.l.shelley@gmail.com)

[elspeth.garman@bioch.ox.ac.uk](mailto:elspeth.garman@bioch.ox.ac.uk)

### Supplementary Figures

**Supplementary Figure 1:** Comparison of the distribution of the  $B_{\text{Damage}}$  values of all atoms in low and high dose models.

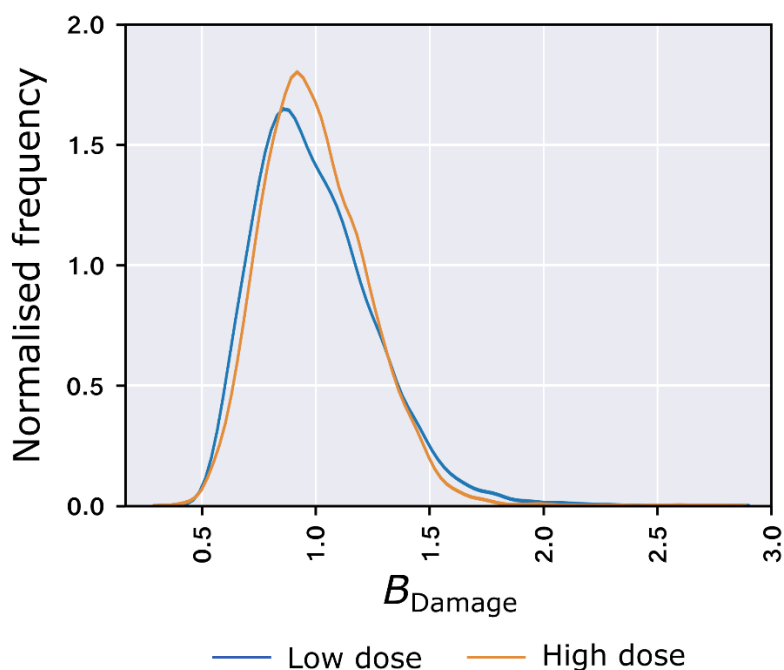

There is minimal difference between the distribution of the  $B_{\text{Damage}}$  values of all atoms in a structure in a low dose (blue curve) structure as compared to a high dose (orange curve) structure. Displayed kernel density estimates are of a low (1.11 MGy, PDB accession code 5MCC, blue curve) and a high (22.7 MGy, PDB accession code 5MCN, orange curve) dose structure of GH7 family cellobiohydrolase<sup>1</sup>. Source data are provided as a Source Data file.

**Supplementary Figure 2:** Investigating the relationship between  $B_{\text{Damage}}$  and dose for the GH7 cellobiohydrolase damage series.

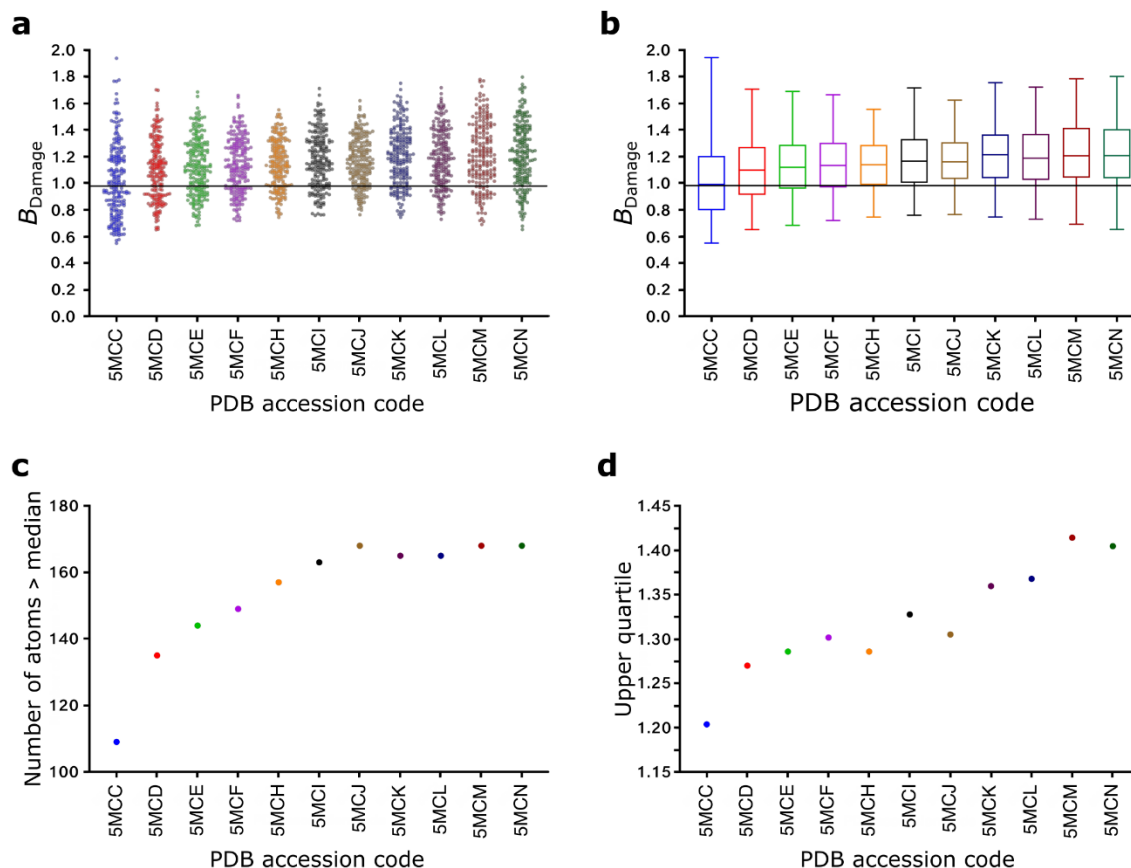

**a** Swarm plots and **b** box plots representing the distribution of the  $B_{\text{Damage}}$  values of the 204 glutamate and aspartate side chain oxygen atoms across the 11 increasingly damaged structures in the GH7 cellobiohydrolase damage series<sup>1</sup> (5MCC = lowest dose; 5MCN = highest dose). In **b**, boxes demarcate the median, lower and upper quartiles, whilst the tails demarcate the minimum and maximum  $B_{\text{Damage}}$  values. The median  $B_{\text{Damage}}$  value of all atoms in the structure varies between 0.96 and 0.98 (depending on the structure): the black line in plots **a** and **b** has been drawn at  $B_{\text{Damage}} = 0.98$ . **c** Whilst the increase in the number of glutamate and aspartate side chain carboxyl group oxygen atoms with a  $B_{\text{Damage}}$  value greater than the median  $B_{\text{Damage}}$  value of all atoms in the structure plateaus, **d** the raw  $B_{\text{Damage}}$  values of these atoms (represented here by the 75<sup>th</sup> percentile) continue to increase. Source data are provided as a Source Data file.

**Supplementary Figure 3:** Setting a lower threshold for the protein size amenable to  $B_{\text{net}}$  analysis.

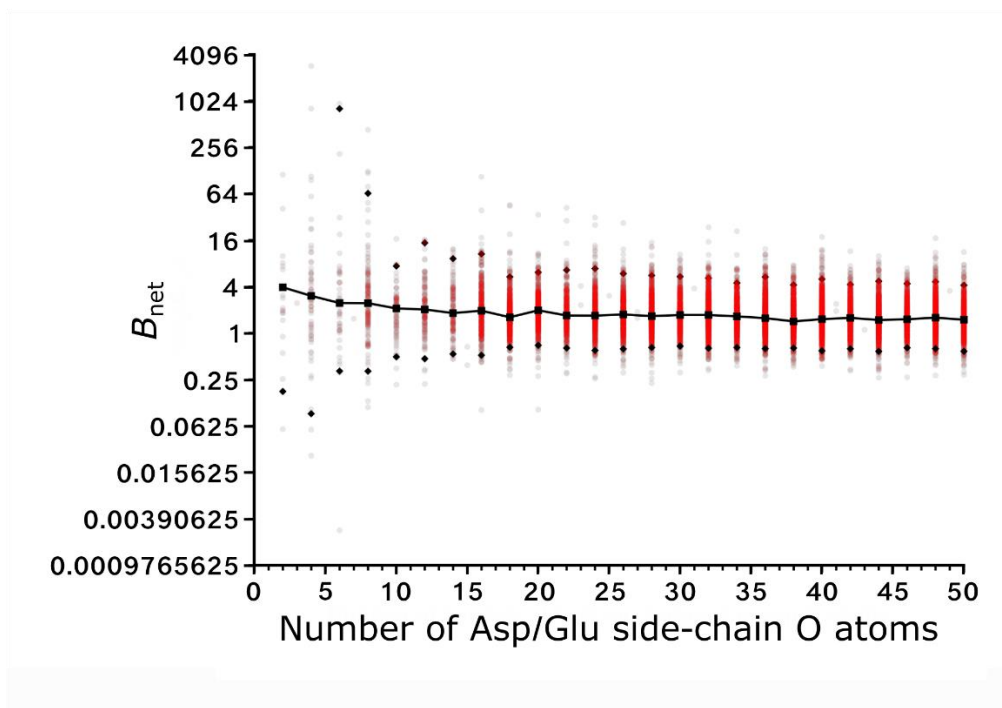

$B_{\text{net}}$  vs. the number of aspartate/glutamate side chain oxygen atoms for structures containing up to 50 such atoms. We expect these two variables to be independent, and therefore for the range and distribution of  $B_{\text{net}}$  values to be the same regardless of the number of side-chain carboxyl group oxygen atoms. However, for very small structures this is not the case, hence we impose a threshold of a minimum 20 aspartate/glutamate side chain oxygen atoms in order to meet this assumption. Red circles represent  $B_{\text{net}}$  values of individual structures, whilst black squares and diamonds represent the median  $B_{\text{net}}$  value plus 95% confidence limits (namely the 2.5<sup>th</sup> and 97.5<sup>th</sup> percentiles), respectively, at every number of side-chain carboxyl group oxygen atoms for which there are 10 or more example structures in the dataset (of 93,978 PDB-REDO structures described in the main text). Note upper confidence limits are not plotted for structures with fewer than six side-chain carboxyl group oxygen atoms because their values are infinite. Source data are provided as a Source Data file.

### Supplementary Figure 4: Damage to Asp/Glu in high $B_{\text{net}}$ structures.

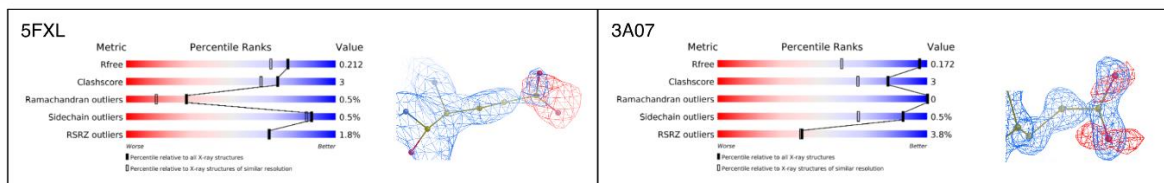

There is clear evidence of radiation damage to aspartate/glutamate side chain carboxyl groups in 5FXL<sup>2</sup> and 3A07<sup>3</sup> in their electron density maps. A representative damaged carboxyl group is shown for each structure. Damage to the disulfide bonds in these structures is shown in Figure 6.  $2mF_{\text{obs}} - DF_{\text{calc}}$  maps (blue) are contoured at 1.5 rmsd;  $F_{\text{obs}} - F_{\text{calc}}$  difference density maps are contoured at +/- 3.0 rmsd (green/red).

### Supplementary Figure 5: $B_{\text{net}}$ and $B_{\text{net}}$ -percentile as a function of PDB deposition year.

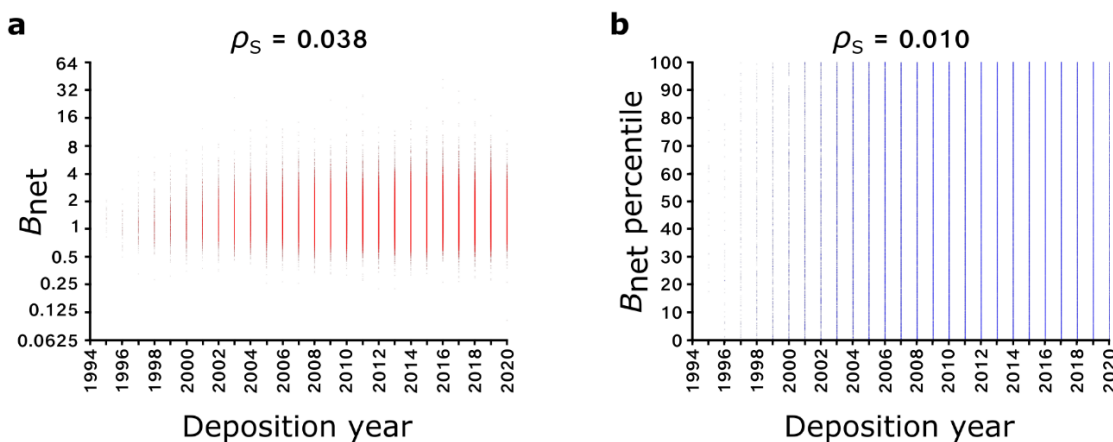

Scatter plots of **a**  $B_{\text{net}}$  and **b**  $B_{\text{net}}$ -percentile vs. deposition year for our dataset of 93,978 PDB-REDO structures. Spearman's rank correlation coefficients ( $\rho_S$ ) indicate no correlation between these variables. Source data are provided at <https://doi.org/10.5281/zenodo.5566558>.

### Supplementary Tables

| Series                                                | $B_{\text{net}}$ (Asp/Glu)    |             |                | $B_{\text{net}}$ (Asn/Gln)    |             |                | Wilson $B$ -factor             |                               |                |
|-------------------------------------------------------|-------------------------------|-------------|----------------|-------------------------------|-------------|----------------|--------------------------------|-------------------------------|----------------|
|                                                       | Gradient (MGy <sup>-1</sup> ) | y-intercept | R <sup>2</sup> | Gradient (MGy <sup>-1</sup> ) | y-intercept | R <sup>2</sup> | Gradient (Å <sup>2</sup> /MGy) | y-intercept (Å <sup>2</sup> ) | R <sup>2</sup> |
| Serrano-Posada <i>et al.</i> , 2015 <sup>4</sup>      | 0.0532                        | 2.32        | 0.00570        | -0.124                        | 2.85        | 0.0242         | 0.0558                         | 11.5                          | 0.00388        |
| Ferraroni <i>et al.</i> , 2012 <sup>5</sup>           | 0.303                         | 0.961       | 0.949          | 0.413                         | 1.27        | 0.612          | -1.58                          | 21.2                          | 0.665          |
| Bui <i>et al.</i> , 2014, series 1 <sup>6</sup>       | 0.313                         | 1.31        | 0.761          | -0.0200                       | 1.88        | 0.988          | 0.922                          | 10.8                          | 0.998          |
| Bui <i>et al.</i> , 2014, series 2 <sup>6</sup>       | 0.534                         | 1.84        | 1.00           | -0.0696                       | 2.36        | 0.764          | 0.376                          | 9.88                          | 0.998          |
| Sutton <i>et al.</i> , 2013 <sup>7</sup>              | 0.285                         | 1.31        | 0.365          | -0.0579                       | 1.70        | 0.0235         | 0.261                          | 10.7                          | 0.703          |
| Castellvi <i>et al.</i> , 2019 <sup>8</sup>           | 1.35                          | 1.68        | 0.868          | -0.113                        | 1.64        | 0.968          | 0.894                          | 6.29                          | 1.00           |
| Zarate-Romero <i>et al.</i> , 2019 <sup>9</sup>       | 0.284                         | 1.24        | 0.994          | 0.00293                       | 1.17        | 0.00419        | -0.273                         | 15.1                          | 0.0716         |
| Taberman <i>et al.</i> , 2019 <sup>10</sup>           | 0.213                         | 1.74        | 0.777          | 0.0417                        | 1.18        | 0.263          | 0.546                          | 10.1                          | 0.984          |
| Dubnovitsky <i>et al.</i> , 2005 <sup>11</sup>        | 0.230                         | 1.35        | 0.977          | 0.0271                        | 2.55        | 0.104          | 0.602                          | 14.8                          | 0.991          |
| Fioravanti <i>et al.</i> , 2007 <sup>12</sup>         | 0.289                         | 1.39        | 0.999          | -0.0327                       | 2.24        | 0.949          | 0.368                          | 17.1                          | 0.904          |
| Juers & Weik, 2011 <sup>13</sup>                      | 0.303                         | 1.51        | 0.843          | 0.0165                        | 1.00        | 0.315          | 0.697                          | 10.9                          | 0.962          |
| Correy, <i>et al.</i> , 2016 <sup>14</sup>            | 0.212                         | 1.36        | 0.911          | 0.00940                       | 1.32        | 0.0543         | 0.995                          | 34.4                          | 0.869          |
| Russi <i>et al.</i> , 2017, series 1 <sup>15</sup>    | 0.308                         | 1.56        | 0.598          | -0.101                        | 2.50        | 0.295          | 0.537                          | 12.6                          | 0.992          |
| Russi <i>et al.</i> , 2017, series 2 <sup>15</sup>    | 0.145                         | 0.888       | 0.836          | -0.0476                       | 1.54        | 0.274          | 0.597                          | 23.4                          | 0.985          |
| Polyakov <i>et al.</i> , 2019, series 1 <sup>16</sup> | 0.516                         | 1.88        | 0.958          | -0.0377                       | 1.84        | 0.0822         | 0.427                          | 9.66                          | 0.750          |
| Polyakov <i>et al.</i> , 2019, series 2 <sup>16</sup> | 0.186                         | 2.12        | 0.613          | 0.0968                        | 1.87        | 0.339          | 0.768                          | 8.49                          | 0.580          |
| Polyakov <i>et al.</i> , 2019, series 3 <sup>16</sup> | 0.677                         | 1.87        | 0.991          | -0.0143                       | 1.92        | 0.0663         | 0.936                          | 8.77                          | 0.912          |
| De la Mora <i>et al.</i> , 2011 <sup>17</sup>         | 0.165                         | 1.34        | 0.838          | -0.0119                       | 1.02        | 0.839          | 0.442                          | 13.6                          | 0.997          |
| Pechkova <i>et al.</i> , 2009, series 1 <sup>18</sup> | 0.0173                        | 1.76        | 0.924          | -0.0174                       | 4.95        | 0.689          | 0.0198                         | 5.95                          | 0.962          |
| Pechkova <i>et al.</i> , 2009, series 2 <sup>18</sup> | 0.0452                        | 2.20        | 0.491          | -0.00914                      | 3.83        | 0.257          | 0.204                          | 9.36                          | 0.774          |
| Fukuda <i>et al.</i> , 2016 <sup>19</sup>             | 0.156                         | 2.82        | 0.946          | 0.00539                       | 1.56        | 0.0205         | 0.0888                         | 9.84                          | 0.602          |
| Hasegawa <i>et al.</i> , 2017 <sup>20</sup>           | -0.0137                       | 2.02        | 0.901          | -0.0125                       | 1.77        | 0.582          | 0.237                          | 10.5                          | 0.985          |
| Bury <i>et al.</i> , 2017 <sup>*1</sup>               | 0.221                         | 1.03        | 0.986          | 0.00303                       | 1.10        | 0.0405         | 0.669                          | 22.8                          | 0.656          |

**Supplementary Table 1:** Gradients and y-intercepts of the lines of best fit calculated for the  $B_{\text{net}}$  vs. dose data for the 23 selected radiation damage series. All values rounded to 3sf. \* symbol indicates final four structures have been excluded from the calculation of the line of best fit plotted for the series in Figure 3.

| Metric                      | $B_{\text{net}}$ (Asp/Glu)    |             | $B_{\text{net}}$ (Asn/Gln)    |             | Wilson $B$ -factor             |                               |
|-----------------------------|-------------------------------|-------------|-------------------------------|-------------|--------------------------------|-------------------------------|
|                             | Gradient (MGy <sup>-1</sup> ) | y-intercept | Gradient (MGy <sup>-1</sup> ) | y-intercept | Gradient (Å <sup>2</sup> /MGy) | y-intercept (Å <sup>2</sup> ) |
| Mean average                | 0.291                         | 1.65        | -0.00237                      | 1.96        | 0.351                          | 13.6                          |
| Relative standard deviation | 97.4%                         | 27.2%       | 4360%                         | 47.8%       | 154%                           | 51.2%                         |

**Supplementary Table 2:** Mean average and relative standard deviation scores calculated for the gradients and y-intercepts of the lines of best fit plotted between  $B_{\text{net}}$  and dose for the 23 radiation damage series listed in Supplementary Table 1. All values rounded to 3sf.

| Publication                                            | Protein                                                     | PDB accession codes                                                                      | Doses (MGy)                                                                              |
|--------------------------------------------------------|-------------------------------------------------------------|------------------------------------------------------------------------------------------|------------------------------------------------------------------------------------------|
| Serrano-Posada <i>et al.</i> , 2015 <sup>4</sup>       | <i>Thermus thermophilus</i> HB27 multicopper oxidase        | 2YAE, 2YAF, 2YAH, 2YAM, 2YAO, 2YAP, 2YAQ, 2YAR                                           | 0.2, 0.4, 0.6, 0.8, 1.0, 1.2, 1.4, 1.6                                                   |
| Ferraroni <i>et al.</i> , 2012 <sup>5</sup>            | <i>Steccherinum ochraceum</i> blue laccase                  | 3T6W, 3T6X, 3T6Z, 3T71                                                                   | 0.14, 0.28, 0.84, 1.26                                                                   |
| Bui <i>et al.</i> , 2014 (series 1) <sup>6</sup>       | <i>Aspergillus flavus</i> urate oxidase (with 5-PMUA)       | 4CW2, 4CW6, 4CW3                                                                         | 0.0025, 0.092, 0.665                                                                     |
| Bui <i>et al.</i> , 2014 (series 2) <sup>6</sup>       | <i>Aspergillus flavus</i> urate oxidase (with 5-PIU)        | 4D13, 4D17, 4D19                                                                         | 0.0022, 0.106, 1.75                                                                      |
| Sutton <i>et al.</i> , 2013 <sup>7</sup>               | <i>Gallus gallus</i> lysozyme                               | 4H8X, 4H8Y, 4H8Z, 4H90, 4H91, 4H92, 4H93, 4H94, 4H9A, 4H9B, 4H9C, 4H9E, 4H9F, 4H9H, 4H9I | 0.07, 0.14, 0.21, 0.28, 0.35, 0.42, 0.49, 0.56, 0.63, 0.70, 0.77, 0.84, 0.91, 0.98, 1.05 |
| Castellvi <i>et al.</i> , 2019 <sup>8</sup>            | <i>Homo sapiens</i> aldose reductase                        | 6F7R, 6F81, 6F82                                                                         | 0.03, 0.75, 1.65                                                                         |
| Zarate-Romero <i>et al.</i> , 2019 <sup>9</sup>        | <i>Neurospora crassa</i> catalase-3                         | 6NSW, 6NSY, 6NSZ, 6NT0, 6NT1                                                             | 0.135, 0.263, 0.526, 1.31, 2.89                                                          |
| Taberman <i>et al.</i> , 2019 <sup>10</sup>            | <i>Streptomyces rubiginosus</i> xylose isomerase            | 6QRR, 6QRS, 6QRT, 6QRU, 6QRV, 6QRW, 6QRX                                                 | 0.13, 0.76, 1.38, 2.01, 2.63, 3.25, 3.88                                                 |
| Dubnovitsky <i>et al.</i> , 2005 <sup>11</sup>         | <i>Bacillus alcalophilus</i> phosphoserine aminotransferase | 2BHX, 2BI1, 2BI2, 2BI3, 2BI5, 2BI9, 2BIA                                                 | 0.022, 0.099, 0.22, 0.88, 1.5, 2.9, 4.7                                                  |
| Fioravanti <i>et al.</i> , 2007 <sup>12</sup>          | <i>Haloarcula marismortui</i> malate dehydrogenase          | 2J5K, 2J5Q, 2J5R                                                                         | 1.2, 4.6, 8.2                                                                            |
| Juers & Weik, 2011 <sup>13</sup>                       | <i>Bacillus thermoproteolyticus</i> thermolysin             | 3P7P, 3P7Q, 3P7R, 3P7S                                                                   | 0.1, 2.5, 4.9, 7.2                                                                       |
| Correy <i>et al.</i> , 2016 <sup>14</sup>              | <i>Lucilia cuprina</i> αE7 carboxylesterase                 | 4QWM, 4UBI, 4UBJ, 4UBK, 4UBM, 4UBL                                                       | 1.85, 3.7, 5.55, 7.4, 9.26, 11.11                                                        |
| Russi <i>et al.</i> , 2017 (series 1) <sup>15</sup>    | <i>Homo sapiens</i> cyclophilin A                           | 5KUL, 5KUN, 5KUO, 5KUQ, 5KUR, 5KUS, 5KUU, 5KUV, 5KUW                                     | 1.11, 2.22, 3.33, 4.44, 5.55, 6.66, 7.77, 8.88, 9.99                                     |
| Russi <i>et al.</i> , 2017 (series 2) <sup>15</sup>    | <i>Thaumatococcus daniellii</i> thaumatin                   | 5KVW, 5KVX, 5KVZ, 5KW0                                                                   | 1.86, 3.72, 5.58, 9.3                                                                    |
| Polyakov <i>et al.</i> , 2019 (series 1) <sup>16</sup> | <i>Steccherinum murashkinskyi</i> laccase                   | 6RGH, 6RGP, 6RHH, 6RHI, 6RHO                                                             | 0.015, 0.165, 0.315, 1.215, 4.065                                                        |
| Polyakov <i>et al.</i> , 2019 (series 2) <sup>16</sup> | <i>Steccherinum murashkinskyi</i> laccase (with chloride)   | 6RHR, 6RHU, 6RHX, 6RIO, 6RI2                                                             | 0.015, 0.165, 0.315, 1.215, 4.065                                                        |

|                                                        |                                                                 |                                                                  |                                                                  |
|--------------------------------------------------------|-----------------------------------------------------------------|------------------------------------------------------------------|------------------------------------------------------------------|
| Polyakov <i>et al.</i> , 2019 (series 3) <sup>16</sup> | <i>Steccherinum murashkinskyi</i> laccase (with fluoride)       | 6RI4, 6RI6, 6RI8, 6RII, 6RIK                                     | 0.013, 0.4, 0.8, 1.2, 5.2                                        |
| De la Mora <i>et al.</i> , 2011 <sup>17</sup>          | <i>Gallus gallus</i> lysozyme                                   | 2YBH, 2YBI, 2YBJ, 2YBL, 2YBM, 2YBN                               | 2.31, 6.62, 12.3, 17.9, 23.3, 28.6                               |
| Pechkova <i>et al.</i> , 2009 (series 1) <sup>18</sup> | <i>Tritirachium album</i> proteinase K, LB nanotemplate         | 3DDZ, 3DE0, 3DE1, 3DE2                                           | 9.6, 22.45, 31.2, 44.05                                          |
| Pechkova <i>et al.</i> , 2009 (series 2) <sup>18</sup> | <i>Tritirachium album</i> proteinase K, classical hanging drop  | 3DE3, 3DE4, 3DE5, 3DE6, 3DE7                                     | 0.85, 9.6, 22.45, 31.2, 44.05                                    |
| Fukuda <i>et al.</i> , 2016 <sup>19</sup>              | <i>Geobacillus thermodenitrificans</i> copper nitrite reductase | 4YSO, 4YSP, 4YSQ, 4YSR, 4YSS, 4YST, 4YSU                         | 0.064, 8.316, 8.38, 16.632, 16.696, 24.948, 25.012               |
| Hasegawa <i>et al.</i> , 2017 <sup>20</sup>            | <i>Photinus pyralis</i> luciferin-regenerating enzyme           | 5GX1, 5GX2, 5GX3, 5GX4, 5GX5                                     | 1.1, 3.3, 6.6, 13.2, 25.3                                        |
| Bury <i>et al.</i> , 2017 <sup>1</sup>                 | <i>Daphnia pulex</i> GH7 family cellobiohydrolase               | 5MCC, 5MCD, 5MCE, 5MCF, 5MCH, 5MCI, 5MCJ, 5MCK, 5MCL, 5MCM, 5MCN | 1.11, 3.27, 5.43, 7.59, 9.75, 11.9, 14.1, 16.2, 18.4, 20.6, 22.7 |

**Supplementary Table 3:** PDB accession codes and associated doses of the PX structures in the 23 radiation damage series analysed. All doses were calculated with RADDOSE (versions 1<sup>21</sup>, 2<sup>22</sup> or 3D<sup>23</sup>). Full metadata collated for each structure in the series is available at <https://doi.org/10.5281/zenodo.5566557>.



| Series                                                | Gradient of line of best fit plotted between $B_{\text{net}}$ and dose ( $\text{MGy}^{-1}$ ) (3sf) |                       |                                                                   |
|-------------------------------------------------------|----------------------------------------------------------------------------------------------------|-----------------------|-------------------------------------------------------------------|
|                                                       | Original dataset from PDB                                                                          | Dataset from PDB-REDO | Original dataset subjected to unrestrained $B$ -factor refinement |
| Serrano-Posada <i>et al.</i> , 2015 <sup>4</sup>      | 0.0532                                                                                             | 0.142                 | -0.0657                                                           |
| Pechkova <i>et al.</i> , 2009, series 1 <sup>18</sup> | 0.0173                                                                                             | -0.0163               | -0.000767                                                         |
| Pechkova <i>et al.</i> , 2009, series 2 <sup>18</sup> | 0.0452                                                                                             | 0.0222                | 0.0543                                                            |
| Hasegawa <i>et al.</i> , 2017 <sup>20</sup>           | -0.0137                                                                                            | 0.105                 | 0.127                                                             |

**Supplementary Table 4:** Further exploration of the relationship between  $B_{\text{net}}$  and dose for four radiation damage datasets (a subset of the 23 datasets listed in Supplementary Tables 1 and 3), each of whose calculated line of best fit between  $B_{\text{net}}$  and dose has an unusually low gradient. These gradients, calculated for structures downloaded from the PDB, are compared with the gradients of the lines of best fit measured between  $B_{\text{net}}$  and dose for: i) equivalent structures downloaded from the PDB-REDO databank; and ii) the original (*i.e.* PDB) structures subjected to three macrocycles of unrestrained  $B$ -factor refinement (see Methods for further details).

| Structure property                        | $B_{\text{net}}$ $\rho_S$ (2sf) | $B_{\text{net}}$ -percentile $\rho_S$ (2sf) |
|-------------------------------------------|---------------------------------|---------------------------------------------|
| Resolution ( $\text{\AA}$ )               | -0.42                           | 0.0078                                      |
| $R_{\text{work}}$                         | -0.41                           | -0.15                                       |
| $R_{\text{free}}$                         | -0.40                           | -0.12                                       |
| Temperature (K)                           | -0.016                          | -0.020                                      |
| Molecular mass (kDa)                      | -0.18                           | -0.0082                                     |
| Number of Asp/Glu side chain oxygen atoms | -0.20                           | -0.032                                      |
| % Asp/Glu                                 | -0.091                          | -0.067                                      |
| $B$ -factor restraint weight              | -0.12                           | -0.17                                       |

**Supplementary Table 5:** Spearman's rank correlation coefficients ( $\rho_S$ ) of the  $B_{\text{net}}$  and  $B_{\text{net}}$ -percentile metrics with eight variables identified as possibly influencing their values (resolution,  $R_{\text{work}}$ ,  $R_{\text{free}}$ , temperature, molecular mass, the number of aspartate/glutamate side chain oxygen atoms, the percentage of aspartate and glutamate residues in the structure, and  $B$ -factor restraint weight).

| PDB accession code | $B_{\text{net}}$ (PDB-REDO structure) | $B_{\text{net}}$ percentile (PDB-REDO structure) (rounded to 4sf if less than 1) | Resolution (3sf) | Resolution bin (min – max) (3sf) | $B_{\text{net}}$ (PDB structure) |
|--------------------|---------------------------------------|----------------------------------------------------------------------------------|------------------|----------------------------------|----------------------------------|
| 5WUC <sup>24</sup> | 42.0                                  | 1                                                                                | 1.60             | 1.60 – 1.60                      | 18.6                             |
| 5FXL <sup>2</sup>  | 34.1                                  | 1                                                                                | 1.78             | 1.77 – 1.79                      | 29.6                             |
| 5XQP <sup>25</sup> | 31.4                                  | 1                                                                                | 1.00             | 0.900 – 1.10                     | 12.9                             |
| 3S8S               | 28.5                                  | 1                                                                                | 1.30             | 1.28 – 1.32                      | 16.3                             |
| 3UX1 <sup>26</sup> | 27.5                                  | 1                                                                                | 2.80             | 2.80 – 2.80                      | 25.1                             |
| 1V70               | 26.6                                  | 0.9991                                                                           | 1.30             | 1.28 – 1.32                      | 12.1                             |
| 6Q5R <sup>27</sup> | 25.4                                  | 0.9996                                                                           | 1.61             | 1.60 – 1.62                      | 48.5                             |
| 3A07 <sup>3</sup>  | 25.1                                  | 1                                                                                | 1.19             | 1.15 – 1.23                      | 10.1                             |
| 6BKL <sup>28</sup> | 23.4                                  | 1                                                                                | 2.00             | 2.00 – 2.00                      | 10.4                             |
| 2XMK <sup>29</sup> | 20.9                                  | 1                                                                                | 1.35             | 1.33 – 1.37                      | 28.1                             |

**Supplementary Table 6:** The  $B_{\text{net}}$ ,  $B_{\text{net}}$ -percentile and resolution values, plus the resolution bin considered when calculating  $B_{\text{net}}$ -percentile scores, for the 10 structures with the highest  $B_{\text{net}}$  values in the PDB-REDO databank as of 19<sup>th</sup> November 2020. For comparison, the  $B_{\text{net}}$  values of the original structures deposited by the authors in the PDB are also provided.

### Supplementary References

1. Bury, C.S., Carmichael, I. & Garman, E.F. OH cleavage from tyrosine: debunking a myth. *J. Syn. Rad.* **24**, 7-18 (2017).
2. Hirano, Y., Amano, Y., Yonemura, S. & Hakoshima, T. The force-sensing device region of alpha-catenin is an intrinsically disordered segment in the absence of intramolecular stabilization of the autoinhibitory form. *Genes Cells* **23**, 370-385 (2018).
3. Tanaka, H. et al. Mechanism by which the lectin actinohivin blocks HIV infection of target cells. *Proc. Natl Acad. Sci. USA* **106**, 15633-15638 (2009).
4. Serrano-Posada, H. et al. X-ray-induced catalytic active-site reduction of a multicopper oxidase: Structural insights into the proton-relay mechanism and O<sub>2</sub>-reduction states. *Acta Cryst. D.* **71**, 2396-2411 (2015).

5. Ferraroni, M. et al. Reaction intermediates and redox state changes in a blue laccase from *Steccherinum ochraceum* observed by crystallographic high/low X-ray dose experiments. *J. Inorg. Biochem.* **111**, 203-209 (2012).
6. Bui, S. et al. Direct evidence for a peroxide intermediate and a reactive enzyme-substrate-dioxygen configuration in a cofactor-free oxidase. *Angew Chem. Int. Ed. Engl.* **53**, 13710-4 (2014).
7. Sutton, K.A. et al. Insights into the mechanism of X-ray-induced disulfide-bond cleavage in lysozyme crystals based on EPR, optical absorption and X-ray diffraction studies. *Acta Cryst. D.* **69**, 2381-94 (2013).
8. Castellvi, A. et al. Efficacy of aldose reductase inhibitors is affected by oxidative stress induced under X-ray irradiation. *Sci. Rep.* **9**, 3177-3177 (2019).
9. Zarate-Romero, A., Stojanoff, V., Cohen, A.E., Hansberg, W. & Rudino-Pinera, E. X-ray driven reduction of Cpd I of Catalase-3 from *N. crassa* reveals differential sensitivity of active sites and formation of ferrous state. *Arch. Biochem. Biophys.* **666**, 107-115 (2019).
10. Taberman, H., Bury, C.S., van der Woerd, M.J., Snell, E.H. & Garman, E.F. Structural knowledge or X-ray damage? A case study on xylose isomerase illustrating both. *J. Syn. Rad.* **26**, 931-944 (2019).
11. Dubnovitsky, A.P., Ravelli, R.B., Popov, A.N. & Papageorgiou, A.C. Strain relief at the active site of phosphoserine aminotransferase induced by radiation damage. *Protein Sci* **14**, 1498-507. (2005).
12. Fioravanti, E., Vellieux, F.M., Amara, P., Madern, D. & Weik, M. Specific radiation damage to acidic residues and its relation to their chemical and structural environment. *J. Syn. Rad.* **14**, 84-91. (2007).
13. Juers, D.H. & Weik, M. Similarities and differences in radiation damage at 100 K versus 160 K in a crystal of thermolysin. *J. Syn. Rad.* **18**, 329-337 (2011).
14. Correy, G.J. et al. Mapping the Accessible Conformational Landscape of an Insect Carboxylesterase Using Conformational Ensemble Analysis and Kinetic Crystallography. *Structure* **24**, 977-987 (2016).
15. Russi, S. et al. Conformational variation of proteins at room temperature is not dominated by radiation damage. *J. Syn. Rad.* **24**, 73-82 (2017).
16. Polyakov, K.M., Gavryushov, S., Fedorova, T.V., Glazunova, O.A. & Popov, A.N. The subatomic resolution study of laccase inhibition by chloride and fluoride anions using single-crystal serial crystallography: insights into the enzymatic reaction mechanism. *Acta Cryst. D.* **75**, 804-816 (2019).
17. De la Mora, E., Carmichael, I. & Garman, E.F. Effective scavenging at cryotemperatures: further increasing the dose tolerance of protein crystals. *J. Syn. Rad.* **18**, 346-57. (2011).
18. Pechkova, E., Tripathi, S., Ravelli, R.B., McSweeney, S. & Nicolini, C. Radiation stability of proteinase K crystals grown by LB nanotemplate method. *J. Struct. Biol.* **168**, 409-418 (2009).
19. Fukuda, Y. et al. Redox-coupled structural changes in nitrite reductase revealed by serial femtosecond and microfocus crystallography. *J. Biochem.* **159**, 527-538 (2016).
20. Hasegawa, K. et al. Development of a dose-limiting data collection strategy for serial synchrotron rotation crystallography. *J. Syn. Rad.* **24**, 29-41 (2017).
21. Murray, J.W., Garman, E.F. & Ravelli, R.B.G. X-ray absorption by macromolecular crystals: the effects of wavelength and crystal composition on absorbed dose. *J. Appl. Cryst.* **37**, 513-522 (2004).

22. Paithankar, K.S., Owen, R.L. & Garman, E.F. Absorbed dose calculations for macromolecular crystals: improvements to RADDOSE. *J. Syn. Rad.* **16**, 152-162 (2009).
23. Zeldin, O.B., Gerstel, M. & Garman, E.F. RADDOSE-3D: time- and space-resolved modelling of dose in macromolecular crystallography. *J. Appl. Cryst.* **46**, 1225-1230 (2013).
24. Su, M. et al. Structural basis for conductance through TRIC cation channels. *Nat. Commun.* **8** 15103-15103 (2017).
25. Mahatabuddin, S. et al. Polypentagonal ice-like water networks emerge solely in an activity-improved variant of ice-binding protein. *Proc. Natl Acad. Sci. USA* **115** 5456-5461 (2018).
26. Dimattia, M.A. et al. Structural insight into the unique properties of adeno-associated virus serotype 9. *J. Virol.* **86**, 6947-6958 (2012).
27. Rhys, G.G. et al. Navigating the Structural Landscape of De Novo alpha-Helical Bundles. *J. Am. Chem. Soc.* **141**, 8787-8797 (2019).
28. Thomaston, J.L., Polizzi, N.F., Konstantinidi, A., Wang, J., Kolocouris, A., DeGrado, W.F. Inhibitors of the M2 Proton Channel Engage and Disrupt Transmembrane Networks of Hydrogen-Bonded Waters. *J. Am. Chem. Soc.* **140**, 15219-15226 (2018).
29. Badarau, A., Firbank, S.J., Mccarthy, A.A., Banfield, M.J. & Dennison, C. Visualizing the Metal-Binding Versatility of Copper Trafficking Sites. *Biochemistry* **49**, 7798-7810 (2010).
